# Supplementary material for: Mechanism and comparison of needle-type non-thermal direct and indirect atmospheric pressure plasma jets on the degradation of dyes
Source: PubMed Central journal article supplement (PMC5052639; doi:10.1038/srep34419), 2016-10-06
Supplement: srep34419-s1.pdf [file srep34419-s1.pdf]

# Mechanism and comparison of the needle-type non-thermal direct and indirect atmospheric pressure plasma jets on the degradation of dyes

Pankaj Attri<sup>a,b\*#</sup>, Maksudbek Yusupov<sup>c#</sup>, Ji Hoon Park<sup>a#</sup>, Lakshmi Prasanna Lingamdinne<sup>d</sup>, Janardhan Reddy Koduru<sup>e</sup>, Masaharu Shiratani<sup>b</sup>, Eun Ha Choi<sup>a\*</sup>, and Annemie Bogaerts<sup>c\*</sup>

<sup>a</sup>Plasma Bioscience Research Center / Department of Electrical and Biological Physics, Kwangwoon University, Seoul 139-701, Korea.

<sup>b</sup>Graduate School of Information Science and Electrical Engineering, Kyushu University Fukuoka 819-0395, Japan

<sup>c</sup>Research Group PLASMANT, Department of Chemistry, University of Antwerp, Universiteitsplein 1, B-2610 Antwerp, Belgium

<sup>d</sup>Department of Environmental Engineering, Kwangwoon University, Seoul, 139-701, Republic of Korea

<sup>e</sup>Graduate School of Environmental Studies, Kwangwoon University, Seoul, 139-701, Republic of Korea

## Supporting file Figure captions

**Fig. S1:** Waveforms of current and voltage for both ID-APPJ and D-APPJ

**Fig. S2:** Degradation percentages calculated by HPLC for (a) MB; (b) MO and (c) CR, after treatment with ID-APPJ and D-APPJ for 20 min and 30 min.

**Fig. S3:** HPLC graphs for MB; (a) control, (b) and (c) after ID-APPJ treatment for 20 min and 30 min, respectively, and (d) and (e) after D-APPJ treatment for 20 min and 30 min, respectively.

**Fig. S4:** HPLC graphs for MO; (a) control, (b) and (c) after ID-APPJ treatment for 20 min and 30 min, respectively, and (d) and (e) after D-APPJ treatment for 20 min and 30 min, respectively.

**Fig. S5:** HPLC graphs for CR; (a) control, (b) and (c) after ID-APPJ treatment for 20 min and 30 min, respectively, and (d) and (e) after D-APPJ treatment for 20 min and 30 min, respectively.

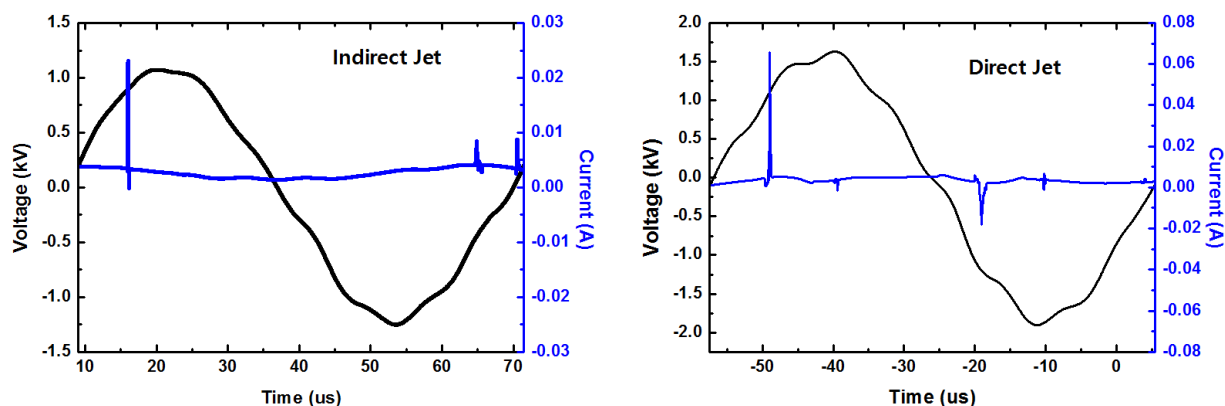

**Fig. S1**

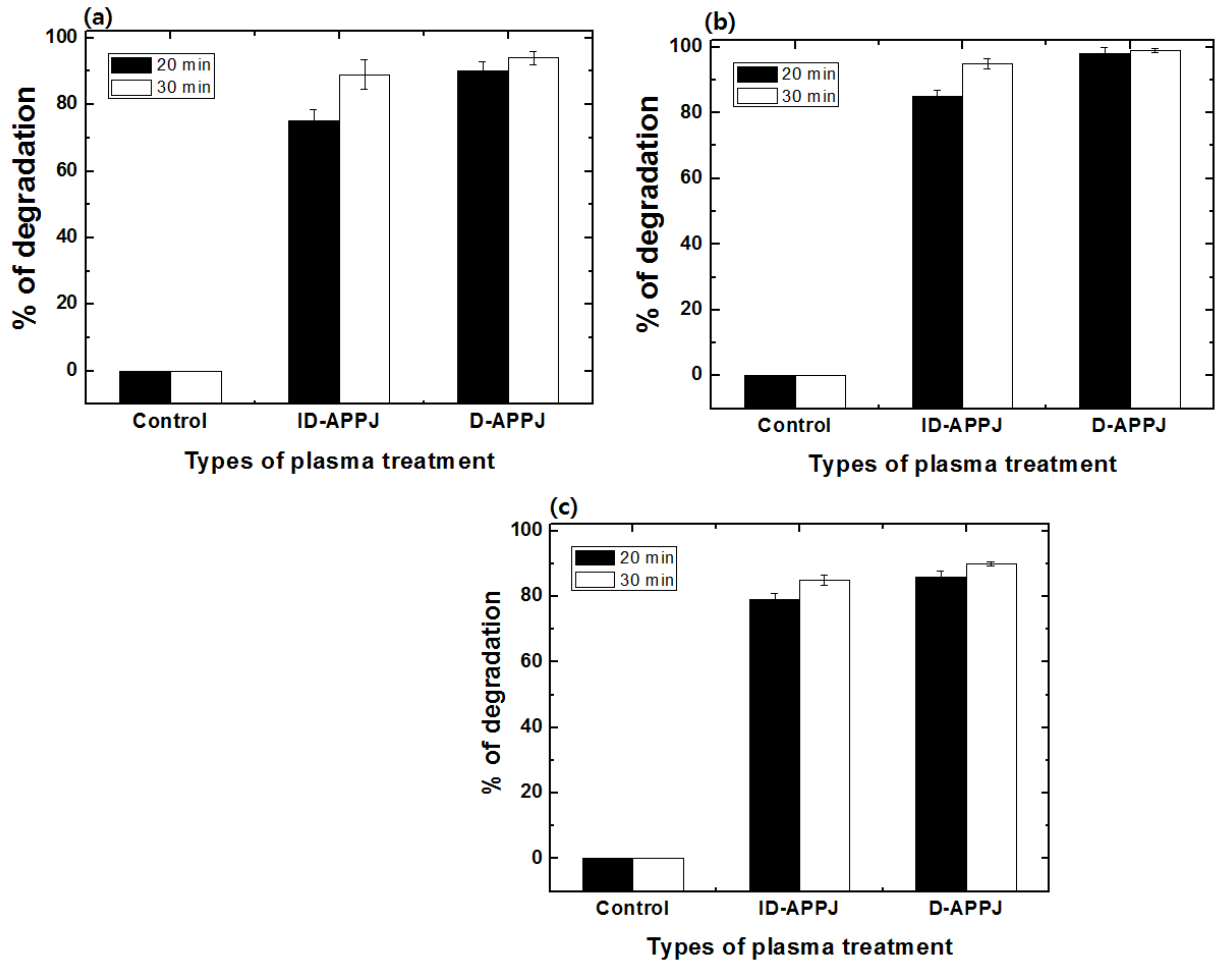

Fig. S2

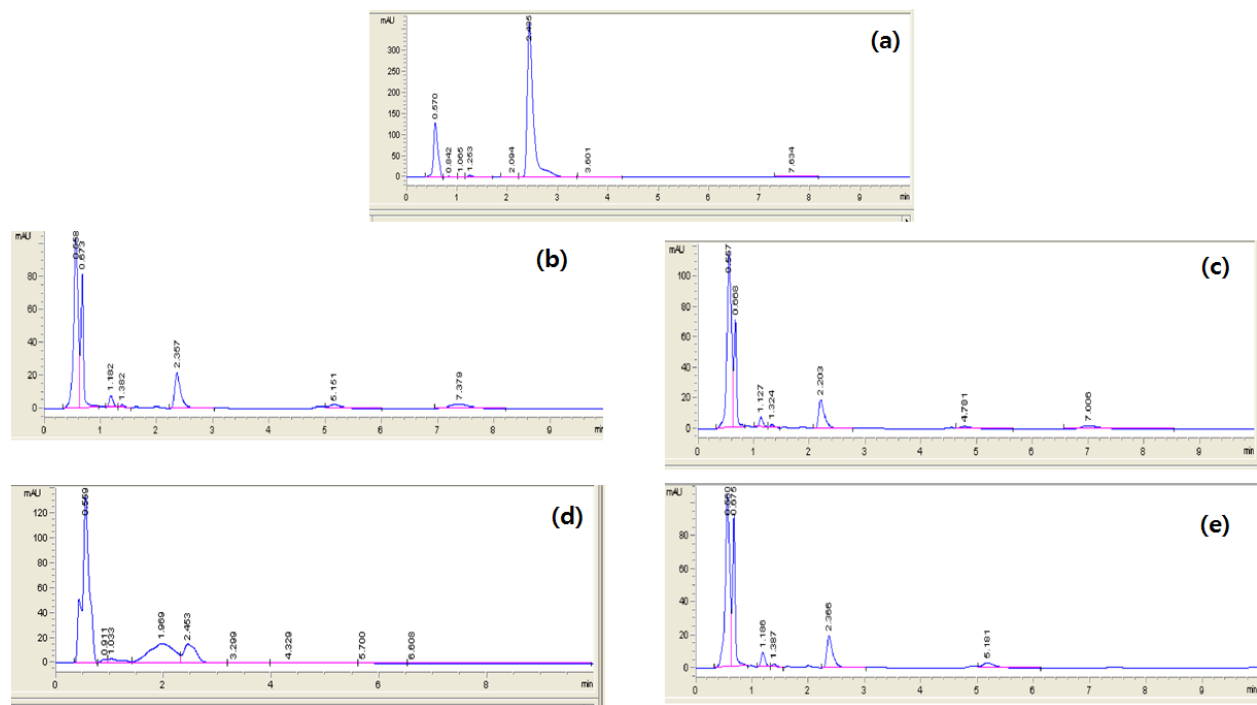

Fig. S3

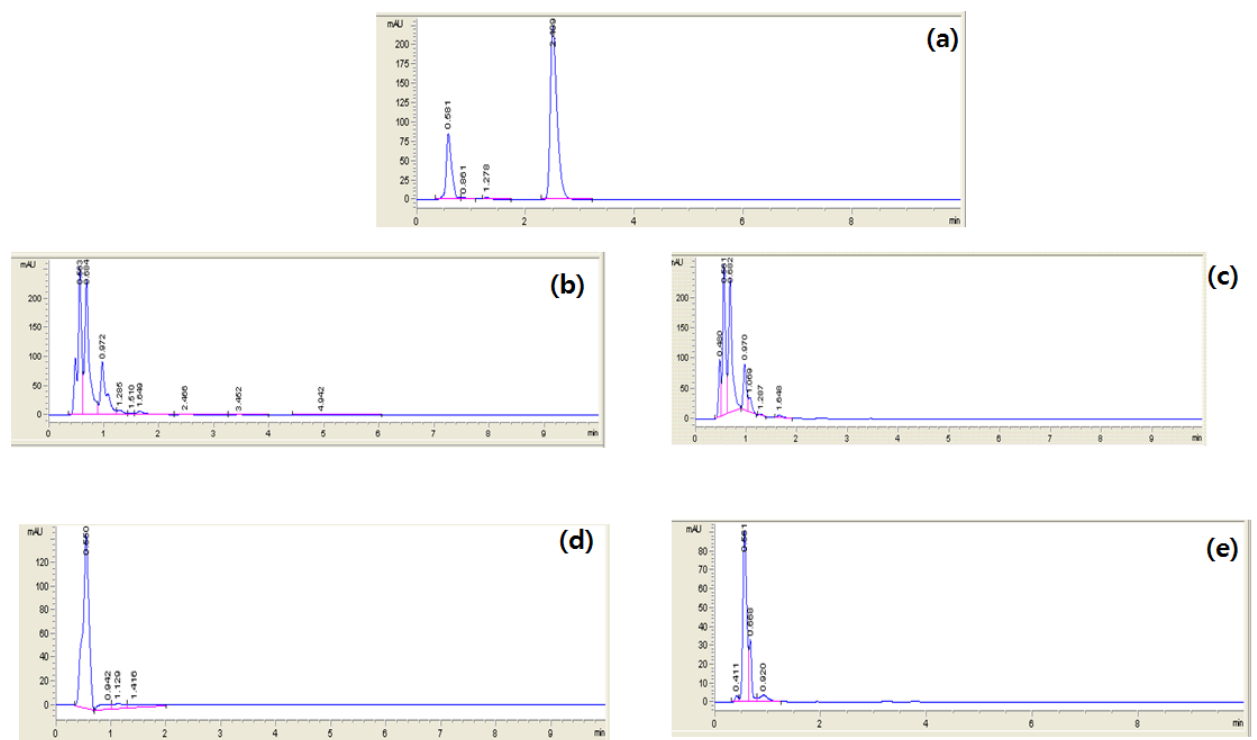

Fig. S4

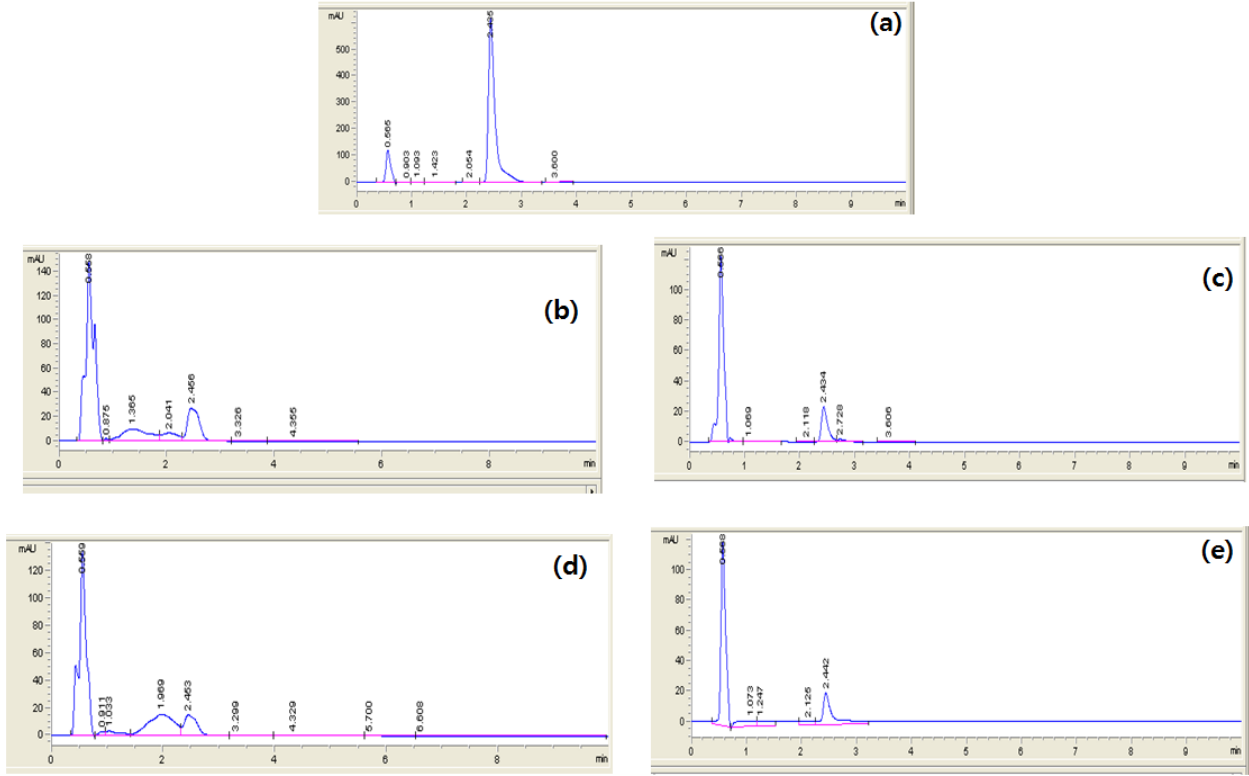

**Fig. S5**
